# Supplementary material for: Attenuated impression of irony created by the mismatch of verbal and nonverbal cues in patients with autism spectrum disorder
Source: PLoS One. 2018 Oct 15;13(10):e0205750. doi: 10.1371/journal.pone.0205750 (PMC6188779; doi:10.1371/journal.pone.0205750)
Supplement: S1 File — (CSV) [file pone.0205750.s001.csv]

ASD-choice frequencies	con_1_1	con_1_2	con_1_3	con_1_4	con_2_1	con_2_2	con_2_3	con_2_4	con_3_1	con_3_2	con_3_3	con_3_4
	31,91	21,28	14,89	31,91	31,25	16,67	20,83	31,25	33,33	4,17	29,17	33,33
	41,67	20,83	20,83	16,67	38,3	12,77	8,51	40,43	8,33	4,17	16,67	70,83
	40	35,56	0	24,44	36,17	19,15	14,89	29,79	16,67	25	37,5	20,83
	31,25	33,33	2,08	33,33	29,17	12,5	22,92	35,42	29,17	0	58,33	12,5
	37,5	29,17	8,33	25	38,3	10,64	10,64	40,43	20,83	0	25	54,17
	39,58	29,17	10,42	20,83	20,83	18,75	22,92	37,5	16,67	4,17	45,83	33,33
	54,17	29,17	10,42	6,25	37,5	25	20,83	16,67	41,67	29,17	25	4,17
	29,17	33,33	8,33	29,17	27,08	27,08	8,33	37,5	8,7	0	52,17	39,13
	43,75	35,42	2,08	18,75	36,17	17,02	8,51	38,3	0	4,17	37,5	58,33
	25,53	31,91	25,53	17,02	18,75	18,75	33,33	29,17	29,17	33,33	29,17	8,33
	58,33	18,75	8,33	14,58	56,25	14,58	10,42	18,75	29,17	20,83	12,5	37,5
	31,25	43,75	2,08	22,92	22,92	20,83	2,08	54,17	12,5	8,33	50	29,17
	56,25	33,33	2,08	8,33	43,75	22,92	10,42	22,92	45,83	0	41,67	12,5
	51,06	29,79	6,38	12,77	54,17	22,92	12,5	10,42	8,33	0	66,67	25
	54,17	31,25	4,17	10,42	54,17	16,67	2,08	27,08	12,5	0	25	62,5
	31,25	33,33	6,25	29,17	36,17	17,02	19,15	27,66	17,39	13,04	43,48	26,09
	38,3	27,66	19,15	14,89	25,53	14,89	36,17	23,4	20,83	16,67	54,17	8,33
	37,5	25	8,33	29,17	20,83	25	14,58	39,58	16,67	4,17	79,17	0
	39,58	25	10,42	25	36,96	28,26	10,87	23,91	29,17	25	20,83	25
	27,08	29,17	6,25	37,5	17,02	21,28	21,28	40,43	25	37,5	20,83	16,67
TD-choice frequencies	con_1_1	con_1_2	con_1_3	con_1_4	con_2_1	con_2_2	con_2_3	con_2_4	con_3_1	con_3_2	con_3_3	con_3_4
	31,91	34,04	10,64	23,4	25	16,67	31,25	27,08	0	0	70,83	29,17
	29,79	27,66	14,89	27,66	35,42	18,75	16,67	29,17	37,5	45,83	4,17	12,5
	39,58	25	8,33	27,08	33,33	18,75	18,75	29,17	16,67	0	70,83	12,5
	37,5	35,42	0	27,08	37,5	22,92	16,67	22,92	20,83	4,17	54,17	20,83
	42,22	28,89	4,44	24,44	53,33	15,56	2,22	28,89	26,09	0	34,78	39,13
	41,67	27,08	2,08	29,17	31,25	8,33	18,75	41,67	21,74	0	60,87	17,39
	29,17	22,92	16,67	31,25	25,53	14,89	27,66	31,91	25	41,67	25	8,33
	42,22	26,67	8,89	22,22	47,83	23,91	13,04	15,22	21,74	4,35	52,17	21,74
	35,42	33,33	0	31,25	22,92	18,75	2,08	56,25	0	0	75	25
	29,17	22,92	10,42	37,5	8,51	8,51	29,79	53,19	16,67	0	50	33,33
	29,17	33,33	2,08	35,42	22,92	25	12,5	39,58	12,5	37,5	37,5	12,5
	29,17	39,58	6,25	25	21,28	29,79	19,15	29,79	16,67	0	62,5	20,83
	58,33	29,17	2,08	10,42	57,45	17,02	17,02	8,51	45,83	20,83	33,33	0
	27,08	33,33	10,42	29,17	18,75	27,08	18,75	35,42	20,83	20,83	41,67	16,67
	35,42	20,83	12,5	31,25	41,67	12,5	12,5	33,33	12,5	8,33	29,17	50
	34,04	44,68	4,26	17,02	16,67	31,25	16,67	35,42	4,17	12,5	54,17	29,17
	41,3	36,96	0	21,74	31,91	25,53	8,51	34,04	0	0	58,33	41,67
	22,86	42,86	25,71	8,57	25	39,29	32,14	3,57	36,84	5,26	57,89	0
	33,33	33,33	2,08	31,25	25	22,92	14,58	37,5	0	8,33	79,17	12,5
	38,3	23,4	0	38,3	38,3	17,02	14,89	29,79	4,17	8,33	58,33	29,17
ASD-reaction times	con_1_1	con_1_2	con_1_3	con_1_4	con_2_1	con_2_2	con_2_3	con_2_4	con_3_1	con_3_2	con_3_3	con_3_4
	2700,04	2369,22	3251,56	3416,78	2756,08	2896,19	3067,84	3297,69	3062,76	2802,90	3267,73	3359,53
	3063,62	2568,15	2825,36	3243,91	3346,98	2705,45	3320,78	3078,76	2564,55	2761,80	3280,20	2852,81
	2842,35	2473,08		3615,15	3168,13	2554,72	3483,93	3076,44	2743,90	2972,00	3395,11	3262,98
	2579,46	2433,79	3393,90	3313,87	2969,06	2537,50	3476,85	3361,58	2947,84		3209,95	3162,33
	2613,14	2102,96	4005,60	3557,16	3171,69	2203,12	3344,44	2769,26	3443,86		2683,35	2912,38
	2358,36	1843,88	2730,64	2909,99	2501,20	2122,09	3250,84	2618,99	2470,30	2118,00	2930,74	2704,06
	2289,36	1699,86	3527,72	3004,77	2567,79	2017,33	3329,47	3080,63	2154,37	2246,59	2979,58	3249,40
	2686,11	2290,29	3821,88	3449,70	3082,94	2670,78	4237,80	3564,66	3532,80		3763,39	3861,28
	2811,16	2476,50	3647,50	3831,02	2848,36	2777,48	3550,90	3502,14		2045,80	3492,06	3288,77
	2689,90	2529,23	2597,56	3308,00	2578,46	2510,59	2856,16	3146,38	2641,01	2859,11	2686,93	2971,70
	2751,55	2477,08	2960,60	3091,07	2875,81	2616,99	2756,48	3305,63	2784,63	2659,22	2755,10	2995,81
	2243,27	1971,92	2458,30	2945,94	2337,94	1972,22	2311,80	2759,35	2322,80	1669,70	2787,53	2576,00
	2181,06	1671,41	4514,60	2607,45	2115,18	1670,36	2800,14	2473,74	2148,83		2799,78	2284,10
	2299,10	1645,89	4330,80	3905,40	2332,41	2293,17	2749,65	3424,86	3109,60		3141,63	3262,33
	2519,61	2151,69	3341,35	3491,14	2739,53	2324,81	3220,80	3108,82	2709,10		3097,50	3011,83
	2851,53	2825,73	4349,40	3397,38	3261,15	2524,59	3707,44	3860,52	3416,20	3664,87	3716,48	3366,57
	3052,65	2137,02	3619,14	4089,86	2696,93	2581,93	3500,51	3469,21	2466,88	3656,45	3239,98	2957,25
	2157,85	2080,72	2192,40	2824,18	1966,28	2389,08	2568,36	2699,31	2154,78	1854,90	2411,38
	2673,67	2623,69	3243,98	3268,48	2735,61	2495,02	3370,62	3668,71	2093,96	2997,73	3310,92	3024,67
	2473,23	2073,84	2302,83	2753,73	2600,04	2101,82	2915,77	2961,31	2535,42	2404,34	2703,04	3162,13
TD-reaction times	con_1_1	con_1_2	con_1_3	con_1_4	con_2_1	con_2_2	con_2_3	con_2_4	con_3_1	con_3_2	con_3_3	con_3_4
	2745,58	2072,15	3548,42	3522,41	2769,58	2527,01	2741,09	3374,80			2449,91	2858,49
	2747,02	2382,33	3072,59	3426,00	2589,82	2590,06	2828,24	3185,89	2612,51	2695,02	3967,70	2841,10
	2553,46	2028,75	2940,33	2912,75	2922,09	1983,27	2640,39	2564,19	2175,30		2364,89	3235,37
	2346,59	2009,95		2969,33	2495,36	1909,68	3151,90	3170,72	2568,80	1233,00	2904,53	3403,04
	2385,28	2438,73	2711,55	3826,11	3170,58	2671,27	3140,80	3700,39	3060,68		3201,15	3515,89
	2755,76	2211,47	4853,90	3682,74	2785,83	3625,00	3235,41	3528,26	2342,24		3292,45	2734,80
	3156,89	2407,95	3137,40	3319,98	2524,22	1984,76	2940,81	3049,18	3014,35	2635,42	2586,48	3444,75
	2999,45	2308,01	4305,83	3811,88	3552,00	2492,40	4194,75	3686,66	3675,26	4768,60	3631,28	3503,04
	1745,62	1348,99		1853,30	2024,74	2008,03	2146,70	2104,20			2365,52	2410,18
	2558,52	2771,89	3658,62	3302,63	3087,48	2693,15	2873,94	3521,23	2537,53		2933,76	3071,00
	1894,09	1580,38	2733,70	2321,82	2222,32	2056,20	2402,25	2518,20	1404,77	1978,19	2183,48	2345,57
	2994,71	2820,05	2855,57	3808,95	3216,84	3130,66	3208,30	3719,08	2798,75		3421,89	3847,68
	2338,86	2244,32	3657,70	3304,84	2467,25	2534,03	2961,41	3022,10	2272,55	2815,54	2662,14
	1588,34	1313,93	1654,28	1921,51	1399,64	1386,15	1972,38	1762,74	1271,00	1726,88	1924,54	1888,30
	2723,16	3101,91	2964,75	3067,66	2749,56	2746,25	3571,17	3150,96	2690,83	3420,35	3221,11	3397,35
	2591,98	2091,99	3356,65	3675,99	2978,05	2572,01	3464,06	3295,17	2984,50	3161,83	3435,05	3094,49
	2530,55	2490,84		3293,15	3054,29	2792,28	2935,43	3478,60			2891,97	3440,55
	3179,95	2482,68	3593,52	3932,67	3861,29	3135,74	4288,08	3584,60	3119,90	2982,20	3494,76
	2613,73	1728,16	3684,10	2738,25	2895,72	2213,86	2673,39	2928,49		3641,95	2756,80	3267,17
	2947,54	2068,29		3604,01	3562,68	2864,94	3854,01	3621,31	4286,70	3164,80	3519,98	2926,20
con_x_y: con_1 means congruent, con_2 means slightly incongruent, con_3 means strongly incongruent. The categories are marked as y: 1 means angry, 2 means happy, 3 means ironic, 4 means ambivalent. Example: ASD group-participant 1 classified 31.91% of the congruent stimuli as angry. His mean reaction time for these classifications was 2700.04 ms.
