# Supplementary material for: Attenuated impression of irony created by the mismatch of verbal and nonverbal cues in patients with autism spectrum disorder
Source: PLOS journal article supplement (doi:10.1371/journal.pone.0205750), 2018-10-15
Supplement: S2 (10.1371/journal.pone.0205750.s002) [file journal.pone.0205750.s002.pdf]

1 **S1 Table. Summary of choice frequencies.**

| Choice frequency           | TD       |           | ASD      |           | <i>t</i> -value | <i>p</i> -value (one-tailed) | Cohen's <i>d</i> |
|----------------------------|----------|-----------|----------|-----------|-----------------|------------------------------|------------------|
|                            | <i>M</i> | <i>SD</i> | <i>M</i> | <i>SD</i> |                 |                              |                  |
| <i>Total</i>               |          |           |          |           |                 |                              |                  |
| Angry                      | 29.9     | 8.7       | 33.8     | 8.6       |                 |                              |                  |
| Happy                      | 22.9     | 6.0       | 21.9     | 4.2       |                 |                              |                  |
| Ironic                     | 19.8     | 6.0       | 17.5     | 6.4       | 1.17            | 0.13                         | 0.37             |
| Ambivalent                 | 27.4     | 8.8       | 26.8     | 8.0       |                 |                              |                  |
| <i>Congruent</i>           |          |           |          |           |                 |                              |                  |
| Angry                      | 35.4     | 7.6       | 40.0     | 9.9       |                 |                              |                  |
| Happy                      | 31.1     | 6.6       | 29.8     | 5.7       |                 |                              |                  |
| Ironic                     | 7.1      | 6.7       | 8.8      | 6.6       | -0.80           | 0.21                         | -0.25            |
| Ambivalent                 | 26.5     | 7.7       | 21.4     | 8.6       |                 |                              |                  |
| <i>Incongruent (Total)</i> |          |           |          |           |                 |                              |                  |
| Angry                      | 26.3     | 10.7      | 29.7     | 8.5       |                 |                              |                  |

|                             |      |      |      |      |      |       |      |
|-----------------------------|------|------|------|------|------|-------|------|
| Happy                       | 17.5 | 7.0  | 16.6 | 5.8  |      |       |      |
| Ironic                      | 28.3 | 8.2  | 23.2 | 8.8  | 1.84 | 0.04* | 0.58 |
| Ambivalent                  | 28.0 | 10.7 | 30.5 | 10.6 |      |       |      |
| <i>Slightly incongruent</i> |      |      |      |      |      |       |      |
| Angry                       | 31.0 | 12.1 | 34.1 | 11.4 |      |       |      |
| Happy                       | 20.7 | 7.5  | 19.1 | 4.8  |      |       |      |
| Ironic                      | 17.2 | 8.1  | 15.6 | 8.9  | 0.59 | 0.28  | 0.19 |
| Ambivalent                  | 31.1 | 12.3 | 31.2 | 10.0 |      |       |      |
| <i>Strongly incongruent</i> |      |      |      |      |      |       |      |
| Angry                       | 17.0 | 13.0 | 21.1 | 11.4 |      |       |      |
| Happy                       | 10.9 | 14.4 | 11.5 | 12.3 |      |       |      |
| Ironic                      | 50.5 | 18.4 | 38.5 | 17.3 | 2.07 | 0.02* | 0.66 |
| Ambivalent                  | 21.6 | 12.9 | 28.9 | 19.6 |      |       |      |

2 Choice frequencies are given in percent.

3 \* The asterisk marks a significant difference.
