# Supplementary material for: Attenuated impression of irony created by the mismatch of verbal and nonverbal cues in patients with autism spectrum disorder
Source: PLOS journal article supplement (doi:10.1371/journal.pone.0205750), 2018-10-15
Supplement: S3 (10.1371/journal.pone.0205750.s003) [file journal.pone.0205750.s003.pdf]

## 1 **Explorative Analysis: reaction times**

2 An explorative analysis was performed to compare reaction times of stimuli which were  
3 categorized as "ironic". Since not every participant categorized at least one stimulus as  
4 "ironic" in every congruence condition, a total of 16 TD participants and 19 ASD participants  
5 were included in this analysis.

6 We conducted a 2 x 2 ANOVA with group as a between subject factor (ASD and TD group)  
7 and congruence condition as a within subject factor (congruent and incongruent) to evaluate  
8 reaction times for "ironic" responses.

9 We found a significant main effect for congruence condition ( $F(1, 33) = 5.8, p = 0.02, \eta^2 =$   
10  $0.15$ ), with faster reaction times for incongruent than congruent stimuli that were categorized  
11 as "ironic". We did not find a significant main effect for group ( $F(1,33) = 0.2, p = 0.64, \eta^2 =$   
12  $0.01$ ) nor a significant interaction ( $F(1, 33) = 0.3, p = 0.60, \eta^2 = 0.01$ ).

13 For incongruent stimuli, the mean reaction time for "ironic" was 3,144 ms (SD = 354 ms) in  
14 the ASD group and 2,988 ms (SD = 521 ms) in the TD group. Taking the degree of  
15 incongruence into account, the shortest reaction times for the "ironic" category were  
16 measured for the strongly incongruent stimuli (ASD:  $M = 3,083$  ms,  $SD = 79$  ms; TD:  $M =$   
17  $2,960$  ms,  $SD = 119$  ms), followed by the slightly incongruent stimuli (ASD:  $M = 3,191$  ms,  
18  $SD = 97$  ms; TD:  $M = 3,061$  ms,  $SD = 132$  ms). The longest reaction times were found for the  
19 congruent stimuli (ASD:  $M = 3,322$  ms,  $SD = 156$  ms; TD:  $M = 3,296$  ms,  $SD = 175$  ms).

20 **Table A. Summary of reaction times.**

| Reaction time               | TD       |           | ASD      |           |
|-----------------------------|----------|-----------|----------|-----------|
|                             | <i>M</i> | <i>SD</i> | <i>M</i> | <i>SD</i> |
| <i>Total</i>                |          |           |          |           |
| Angry                       | 2,666    | 480       | 2,664    | 310       |
| Happy                       | 2,346    | 431       | 2,332    | 321       |
| Ironic                      | 3,002    | 508       | 3,160    | 367       |
| Ambivalent                  | 3,168    | 539       | 3,169    | 331       |
| <i>Congruent</i>            |          |           |          |           |
| Angry                       | 2,570    | 423       | 2,592    | 265       |
| Happy                       | 2,195    | 451       | 2,222    | 331       |
| Ironic                      | 3,296    | 702       | 3,322    | 680       |
| Ambivalent                  | 3,215    | 595       | 3,301    | 383       |
| <i>Incongruent (Total)</i>  |          |           |          |           |
| Angry                       | 2,765    | 546       | 2,721    | 372       |
| Happy                       | 2,560    | 503       | 2,461    | 345       |
| Ironic                      | 2,988    | 521       | 3,144    | 354       |
| Ambivalent                  | 3,125    | 504       | 3,123    | 340       |
| <i>Slightly incongruent</i> |          |           |          |           |
| Angry                       | 2,816    | 548       | 2,733    | 365       |
| Happy                       | 2,496    | 504       | 2,398    | 300       |
| Ironic                      | 3,061    | 588       | 3,191    | 433       |
| Ambivalent                  | 3,148    | 530       | 3,161    | 363       |
| <i>Strongly incongruent</i> |          |           |          |           |

|            |       |     |       |     |
|------------|-------|-----|-------|-----|
| Angry      | 2,676 | 721 | 2,700 | 441 |
| Happy      | 2,852 | 892 | 2,622 | 586 |
| Ironic     | 2,960 | 532 | 3,083 | 355 |
| Ambivalent | 3,068 | 480 | 3,067 | 330 |

21 Times are given in milliseconds.
